# Supplementary material
Source: publisher figshare collection journal article supplement (https://tandf.figshare.com/ndownloader/files/17544197)
Supplement: Supplementary file 1 [file 17544197]

Composition of natural phytoplankton community has minor effects on autochthonous dissolved organic matter characteristics

Lumi Haraguchi; E. Asmala; H. H. Jakobsen; and J. Carstensen

**Table SI:** Significant rates of change (P < 0.05) derived from the repeated measures mixed model for the different phases of the two seasonal experiments, for the plankton community components and FDOM variables. Rates were estimated as the difference between start and end day divided by number of days. For phytoplankton, microzooplankton and bacteria response variables, rates are expressed as relative changes per day. Non-significant rates (P > 0.05) are not shown. Phases with a significant change in rates between control (C) and treatment (T) are shaded in grey.

|  | Phases | | | | | | | |
| --- | --- | --- | --- | --- | --- | --- | --- | --- |
| Spring experiment | S1 | | S2 | | S3 | | S4 | |
| C | T | C | T | C | T | C | T |
| Ccryptophytes (% d-1) |  |  |  |  | -38% | -40% | -52% | -40% |
| Cdiatoms (% d-1) | 85% | 108% | 81% |  |  | 48% | 22% | 39% |
| Cothers (% d-1) |  | 37% | 53% |  | -43% | -32% |  |  |
| Cciliates (% d-1) | 23% | 51% | 31% |  | -23% | -35% | -63% | -54% |
| Crotifers (% d-1) |  |  | 107% | 69% |  | 61% | 58% |  |
| Abacteria (% d-1) | 41% | 51% | -57% | -58% | 38% | 43% | 29% |  |
| Peak-C (R.U. d-1) | -0.028 | -0.031 | 0.035 | 0.034 |  | 0.011 |  |  |
| Peak-T (R.U. d-1) | 0.008 | 0.010 |  |  | -0.007 |  |  | -0.003 |
| Autumn experiment | A1 | | A2 | | A3 | | A4 | |
| C | T | C | T | C | T | C | T |
| Ccryptophytes (% d-1) | -26% |  |  | -48% | -76% |  |  |  |
| Cdiatoms (% d-1) | 188% | 167% | 43% | 136% |  |  |  |  |
| Cothers (% d-1) | 43% | 96% |  | -14% |  | -47% |  |  |
| Cciliates (% d-1) | 152% | 151% | -29% | -25% | -39% | -41% |  |  |
| Crotifers (% d-1) | 136% | 128% | 29% | 72% | -45% | -54% |  |  |
| Abacteria (% d-1) |  |  |  |  |  | -19% | -24% |  |
| Peak-C (R.U. d-1) |  | -0.003 | -0.003 | 0.004 |  | -0.002 | 0.005 | 0.008 |
| Peak-T (R.U. d-1) | -0.006 | -0.006 |  |  |  |  | -0.005 | -0.008 |
